# Supplementary material for: Development of quality outcome indicators to improve the quality of urinary and faecal continence care
Source: Int Urogynecol J. 2018 Oct 16;30(1):23–32. doi: 10.1007/s00192-018-3768-2 (PMC6514083; doi:10.1007/s00192-018-3768-2)
Supplement: Supplementary file 1 — Prioritisation criteria (XLSX 48 kb) [file 192_2018_3768_MOESM1_ESM.xlsx]

## Sheet: Cover
		Defining KPIs for toileting and containment strategies
		Overview of all KPIs gathered through our data charting secondary research
		2018-06-19 08:23:30
		This document includes:
		1. KPI Longlist - 158 KPI titles and template for expert panel prioritisation criteria application 2. Prioritisation Criteria - Reference guide of the Prioritisation Criteria and ranking mechanism to be applied by the expert panel in worksheet "1. KPI Longlist"
		In the event that information within this analyses is changed, you will do so at your own risk and without any responsibility or liability on the part of KPMG.
		PRIVATE AND CONFIDENTIAL

## Sheet: 1. KPI Longlist 
KPI longlist and template for expert panel Prioritisation Criteria application
Key
KPI title	= Title of the Key Performance Indicator (KPI) found in our secondary research
Description	= Relevant information to the KPI included in the secondary research
Prioritisation Criteria	= The prioritisation criteria will be applied by the expert panel to remove, reframe, or rephrase the KPIs gathered through secondary research
In scope	= Expert panel to input 'Y' or 'N' to indicate whether the KPI is within the scope of our research
Relevant	= Expert panel to input 'H', 'M', 'L', to indicate whether the indicator is relevant to a) patients b) care providers c) payers
Measurable	= Expert panel to input 'H', 'M', 'L', to indicate whether the KPI is linked to a process that can be measured
Robust	= Expert panel to input 'H', 'M', 'L', to indicate whether the KPI is supported by validated endpoints
Y	= This KPI is in scope for the purpose of our research
N	= This KPI is NOT in scope for the purpose of our research
H	= View worksheet 'Prioritisation Criteria' for definition of a HIGH ranking per criteria
M	= View worksheet 'Prioritisation Criteria' for definition of a MEDIUM ranking per criteria
L	= View worksheet 'Prioritisation Criteria' for definition of a LOW ranking per criteria
					Please input 'Y' or 'N' to indicate whether the KPI is within the scope of our research	Please input 'H', 'M', 'L', to indicate whether the indicator is relevant to a) patients b) care providers c) payers (ranking mechanism described in the next worksheet)	Please input 'H', 'M', 'L', to indicate whether the KPI is linked to a process that can be measured (ranking mechanism described in the next worksheet)	Please input 'H', 'M', 'L', to indicate whether the KPI is supported by validated endpoints (ranking mechanism described in the next worksheet)
	KPI title	Description	Source reference number	Expert panel commentary	Prioritisation Criteria
					In scope	Relevant	Measurable	Robust
	Incidence and prevalence of urinary incontinence	Aim of this indicator is to avoid or reduce the risk of urinary incontinence. It is defined by accurate rates of incidence and prevalence obtained through large population-based surveys, supplemented with general practice data such as surveys with up-to-date local estimates of incidence and prevalence. For example: i) For a given GP population and year: the number of people who present with urina…	80, 16, 18, 30, 40
	Prevalence of urinary incontinence in long term care	Aim of this indicator is to avoid or reduce the risk of urinary incontinence. It is defined by a a given long-term care population and point in tme: the number of residents with urinary incontinence at the time of survey, divided by the size of the population of interest. The resulting fraction, should be expressed as a percentage, and reported with the numerator as an overall age-standardised fi…	80, 3, 79
	Incidence of urinary incontinence among women following pregnancy	Aim of this indicator is to avoid or reduce risk of urinary incontinence It is defined by a given GP population and year: the number of women who having had a baby in the given year, present with urinary incontinence within a year of the birth, divided by the total number of women who have had a baby int he given year. The resulting fraction should be expressed as a percentage, and reported with …	80, 79
	Clinical assessment rates following presentation with urinary incontinence within a GP population	Aim of this indicator is to avoid or reduce adverse effects of delayed diagnosis and treatment It is defined by a given GP population and year: the number of patients whose initial presentation with incontinence led to both follw-up actions (listed below) within 30 days of the intial presentation, divided by the number of initial presentations with incontinence. The resulting fraction should be e…	80
	Rate of referral following presentation with urinary incontinence within a GP population	Aim of this indicator is to avoid or reduce adverse effects of delayed diagnosis and treatment It is defined by a given GP population and year: the number of patients whose initial presentation with incontinence led to a referral to a relevant continence specialist (medical, nursing or therapy) within one month of presentation, divided by the number of initial presentations with incontinence. The…	80, 58, 59, 72
	Clinical assessment rates following presentation with urinary incontinence in long-term care	Aim of this indicator is to avoid or reduce adverse effects of delayed diagnosis and treatment. It is defined by a given long-term care (defined here as residential homes, nursing homes and NHS hopsital long term care) with incontinence, who meet the criteria for assessment of their incontinence (see below), divided by the number of residents with urinary incontinence. The resulting fraction shou…	80
	Use of indwelling urethral catheters in long term care	Aim of this indicator is to reduce impact of incontinence on general well-being. It is defined by a given long stay care population (defined here as residential homes, nursing homes and NHS hopsital long term care) and point in time: the number of residents with urethral catheters which have been indwelling for longer than four weeks, divided by the number of residents with incontinence in the gi…	80, 64, 79
	Changes in health related quality fo life as assessed before treatment to six month afterwards within a provider population receiving treatment for urinary incontinence	Aim of this indicator is to reduce impact of urinary inconitnence on general well-being It is defined by a given population of patients undergoing treatment for incontinence, at a given provider unit, in a given year: a summary of the changes observed in individual patients, from pre-treatment baseline (recorded within the given year), to a follow-up at six months after treatment, with respect to…	80, 1, 2, 40
	A measure of the attainment of patient specified outcome goals, within a population receiving treatment for urinary incontinence	Aim of this indicator is to reduce impact of urinary incontinence on general well-being. It is defined by a given population of patients with urinary incontinence, and year: a summary of patient’s scores with respect to a measure of attainment of patient specified goals. It is intended that a maximum of five goals are specified at the outset of a programme of care, with a binary assessment of the…	80, 1, 7, 15, 30, 33, 40, 51, 59
	Frequency of fecal incontinence	Measured through feca incontinence symptom measure	1, 40
	Frequency of recording bowel movements in Stool diary/bowel chat		1
	Referral to other treatment providers		1
	Financial impact/burden of incontinence for patients, payers, hospitals		2
	Reducing social stigma		2
	Prevalence of nursing home residents on a toileting programme	The aim of this indicator is to monitor the number of nursing home residents whose self-performance of toileting is livel 1 (supervision), level 2 (limited assistance), level 3 (extensive assistance), or level 4 (total dependence). Level 4 residents should be offered assistance with toileting: every 2 hours while awake, sheducle based on formal need assessment (24 hour voiding record or pad test)…	3, 5
	Prevalence of nursing home residents without a toileting plan	This indicator is calculated by dividing all residents rated on two minimum data sets as being on scheduled toileting or bladder retraining program by the number or residents rates as occasionally or frequently incontinent	3
	Documentation of presence or absence of urinary incontinence at time of admission to care	Aim of this indicator is to avoid or reduce adverse effects of delayed diagnosis and treatment, and reduce variation in identification, assessment and management of urinary incontinence. For residents in long term care settings: If a resident has a new urinary incontinence that persists for over 1 month or urinary incontinence on initial assessment then the following tests should be obtained or t…	3, 4, 5
	Percentage of nursing home resident satisfaction with toileting assistance	If a nursing home resident or proxy reports request on assistance with toileting then the resident should report that she is satisfied with the likeliness of staff response to their request. If a nursing home residents remains incontinent after transient causes are treated then residents should be placed on a 3-5 day toileting assistance trial. If a nursing home resident who is incapable of indep…	3, 5, 16, 23, 30
	First-line use of absorbent pads for nursing home residents who are incontinent	Absorbent pads and diapers used as first-line - these should be used as an adjunct to other therapy during evaluation period - elders should be made aware of alternative treatments not just these - pharmacological treatments, electrical stimulation and behavioural therapy Discuss treatment options for urinary incontinence - if vulnerable elder has new urinary incontinence - options should be disc…	4
	Catheter use for patients who are not candidates for alternative interventions due to severe physical or mental impairments	No direct evidence that adherence to this indicator will result in improved patient outcomes. However - basis of known risk for urinary track infections from long-term indwelling catheters, intermittent catheterization is recommended (supported by AHCPR). Suprapubic catheterization avoids urethra complications however can include uncontrolled urine leakage, skin erosion, hematoma formation and pr…	4
	Difference in occurrence and healing time of Stage I and Stage II	sThe aim of this outcome is to record and aim for significantly decreased healing times for for Stage I and Stage II Pressure Uclers - mean of 23 days preintervention to 16 days postintervention Results in direct savings in health care costs	6
	Incorporation of skin protectant into skin care protocols and the occurrence rate of urinary and feacal incontinence		6
	Incidence and prevalence of fecal incontinence	Patient symptoms: frequency of incontinence of stool or flatus (e.g. diary or self-report), degree of incontinence (e.g. stool weight) and episode of anal urgency	8, 16
	Wearing time and frequency of anal plug use		8
	Leakage rate with anal plug use		8, 22, 23
	Odour control with containment products		8, 20, 23, 60, 66
	Patient satisfaction with incontinence-controlling capacity using an anal plug including, comfort of plug removal/ease of removal	Including tolerability of plug and persistence in using the pluc, comfort of plug in use, feeling of cleanness	8, 16, 23
	Impact of incontinence on health status, social life and Quality of Life	The product features of highest importance are those influencing skin wetness. The type and extent of the incontinence as well as skin condition are the most crucial individual-related factors.	8, 31
	Number of patients with incontinence associated dermatitis (residual i.e. not healed)		9, 49, 53, 65
	Number of new patients with incontinence associated dermatits		9
	Number of patients not satisfied with treatment of incontinence associated dermatitis		9
	Number of patients with pain due to incontinence associated dermatitis		9, 42
	Number of patients who have incontinence associated dermatitis with pain due to skin care product or procedure	includes number of patients with adverse reaction due to the skin care product or procedure, e.g. skin irritation, rash, itching, allergic reaction	9, 63
	Incrementatal cost effectiveness of incontinence associated dermatitis treatment (zioc oxide vs. film-forming skin product)		9
	Surface affected by incontinence associated dermatits		9
	Quality of life for patients with incontinence associated dermatitis	QoL - condition specific, generic (e.g. SF-36, EQ-5D, Manchester Short Assessment of QoL), psychosocial	9, 12
	Cost of products	Financial indicators previously used includes cost per pad	9, 27, 47
	Staff time to toilet		9, 27
	Incontinence assocatied dermatitis severity		9, 23
	Number of patients with bacterial or fungal infection		9
	Number of patients with deterioration of skin integrity		9, 18, 20, 27
	Number of patients with healthy skin	Calculated by the amount of moisture, amount of sebum and reduction in dermatitis scores	9
	Incidence of pressure ulcers and incontinence-associated dermatitis		9, 10, 58
	Comfort and tolerance of the patient		9, 14
	Noctoria reduction	Nocturia reduction through provision of night time product requirements with heavier absorbency rating - prevent skin wetness and soiled bed linens - older individuals produce more urine at night than during the day Sleep-disturbing voiding or nocturia - caused by a nocturnal decrease in vasopressin over time rather than sudden bladder contractions of idiopathic origins or neurogenic bladder (ove…	13, 20, 48, 50
	Incidence of urinary tract infection		15, 27, 82, 86
	Severity or urinary tract infection		15
	Incidence of skin rash and skin breakdown		15
	Measures of cost		15
	Measures of caregivers preparedness, role strain and burden		15
	Number of incontinence episodes in 24h	As indicated from completed bladder charts, total number and mean) Calculated by the volume, frequency and timing	15, 18, 24, 27, 28, 50, 51
	Pad changes due to incontinence over 24h	As reported by the patient or cargiver, as a total number or mean	15, 18, 24, 27, 60
	Pad weight	Weight of wet pads and dry pads	15, 24, 42, 83
	Voided volume		15, 24, 27
	Maintenance of skin integrity		15, 24
	Quality of life	Primary outcome measure reported through PROMs: generic or disease specific PROMS such as health related QoL and functioning identification of QoL issues that should be used to inform new/improved continence product development and evaluation Patient reported outcomes: -% improvement in St Marks Incontinence Score - % improvement in Cleveland Clinic Incontinence Score - % improvement in the Rockw…	7, 16, 18, 20, 22, 23, 25, 27, 28, 30, 31, 32, 40, 45, 48, 50, 51, 58, 60, 64, 65, 73, 74, 81, 83, 84
	Patient rating of the quality of patient - physician communication		16, 75, 76
	Referral to specialist or social care	Indicator related to health services and resource use	16
	Patient empowerement, measuring using available self-reported instruments	Patients are given enough time to self-care and are not being hurried by staff Patients have a choice in their care, preservation of autonomy and ability to exercise choice over decision, increase older peoples feelings of inclusion and self worth	16, 75, 76
	Healthcare professional awareness of patients Quality of Life		16
	Dryness levels of residents in nursing homes		18
	Self intiiated requests for toileting in 24h	Moniroting of the number of participant-initiated toileting episodes in 24h (e.g. from completed bladder charts)	18, 27
	Number of completed toiletings divied by total number of expected toiletings during the specified time period		18
	Opinion of pad by patients		20
	Perception of self (normality, feminity)		20
	Interpersonal relationships (partners / sexuality), family/friends, working life	Quality of Life Domains and indicators Interpersonal relations: interactions (social networks, social contacts), relationships (family friends, peers), supports (emotional, physical financial, feedback)	20, 32
	Ease of use of pad	Indicator refers to changing pads, disposal, cots and extra work	20
	Pad performance	The following features are suggested to be measured in order to evaluate pad performance: - ability to hold urine - comfort - ability to contain smell - fit of pad - discreteness - size - comfort (dry and wet) - ability to keep skin dry - how kind was pad to skin - ease of putting on - ability to stay in pace - ease of opening pack - ease of carrying pack - ease of disposal - noiselessness - styl…	20, 71
	Limitation in daily activities due to urisheath wear		22
	Physical limitation due to urisheath wear		22
	Social limitation due to urisheath wear		22
	Severity of urinary incontinence	severity of involuntary loss of urine - measured by the self-completed condition specific International Consultation on Incontinence Questionnaire Short Form - frequency, volume and impact on daily life	23, 27, 28
	Percentage of reduction in leakage frequency	Measured through a leakage diary, recording the frequency and severity of leaks	23, 42, 45, 50, 60, 65, 66, 71
	Timescale required to achieve full assessment and management of fecal incontinent patients	When previously monitored, two period times were calculated to record this outcome measure: - time from referral by primary care to first clinic appointment to competition of management - time from initiation of management i.e. first clinical appointment to competition of management	25
	Patient satisfaction with provided care	When previously monitored, the outcome measure recorded a patient satisfaction and feedback score, focusing on perception on management monitoring: - waiting time from referral to first clinic appointment - time required for completion of management - adequacy of time given to patient - protection of patients privacy Monitored through EuroQol, I-QOL or Zarit Burden Inventory	25, 27, 28, 30, 41, 62, 73
	Mean proportion of hourly checks that participants are wet	Indicator aims to measure the quantification of symptoms	27
	Number of staff or cargivers adhering to the research protocol		24, 27
	Carer satisfaction and experience	Monitored through EuroQol, I-QOL or Zarit Burden Inventory	27
	Cost of providing toileting assistance		27
	Costs: use of diagnostics, treatment and incontinence pads		28
	Productivity costs, time costs and travel costs	In areas where professional care is needed, the total cost of incontinence management using absorbent products includes both product cost as well as consequence and indirect cost. The staff cost to change products may be affected by the frequency of change and the time it takes to change, including the change to new clothes if the old clothes are soiled. The type and the quality of the products h…	28, 31, 57
	Structural implementation of toileting plans	Indicator: Objectives Structure: To evaluate the supports available in the organization that allow for nurses to implement the prompted voiding interventions and to evaluate the supports available in the organization that allow for care providers to implement the guideline. Process: To evaluate the changes in practice that lead towards implementation of the prompted voiding interventions. Outcome…	29
	Policies and procedures related to the use of prompted voiding internvetions consistent with national guidelines	Level of Indicator: Organization / Unit Structure: Presence of relevant policies and procedures. Number and type of learning opportunities. Availability of client education resources that are consistent with best practice recommendations. Identification and provision of appropriate funds/[personnel to support implementation and maintenance of practice change. Continence investment in staff traini…	29
	Percentage of full-time, part-time and casual nurses attending best practice guideline education sessions on prompted voiding	Level of Indicator: Nurse Structure: Percentage of full-time, part-time and casual nurses attending the best practice guideline education sessions on prompted voiding Process: Nurses self-assessed knowledge of: risk factors for urinary incontinence. Continence assessment, prompted voiding, individualised toileting, the impact of cognitive impairment on ability to be continent, relation of bowel h…	29
	Provision of adequate financial and human resources for guideline implementation	Level of indicator: financials costs Structure: Provision of adequate financial and human resources for guideline implementation Process: Cost related to implementing the guideline: education and access to workplace supports, new documentation tools, support systems, evaluation costs. Cost of attendance and follow-up, continuing education (direct and indirect). Outcome: Overall resource utilizati…	29
	Level of patient autonomy	The following should be assess in patients with UI using disposable absorbing aids according to ISO 15621): 1. Quality of Life 2. Level of autonomy 3. Nature of incontinence 4. Individual patient characteristics/preferences 5. Level of activity	30
	Individual patient characteristics/preferences		30
	Percentage distribution of diapers according to their absorption capacity		30
	Average use of diapers per month		30
	Percentage of patients with a high risk of suffering urinary incontinence that received some type of health education		30
	Number of absorbents prescribed to patients over a specific period of time, price of the absorbents prescribed over a determinate period of time		30
	Number of ultra-ight absorbents prescribed to patients over a specific period of time		30
	Indwelling urinary catheter prevalence		30
	Access to toileting facilities	Participants identified the following key quality principles to improve the quality of care and well-being of people with incontinence at home and in the community: 5. Re-enablement and enabling environments o Promoting an incontinence-friendly environment at home, at work and in the community that supports independent living and social participation, including easy access to clean public toilets…	31, 33
	Independent management of incontinence	Use of self-management and techniques to manage incontinence	31, 57
	Adaption to individual patient needs (i.e. impaired mobility, impaired eyesights) through product selection	A wide range of physical and mental impairments can restrict the ability to independently cope with incontinence. Impaired mobility may make some product choices impractical or require toilet or clothing modification to allow effective use of the product. Reduced dexterity — problems with hand or finger movement — can make it difficult to use some products. Impaired eyesight limits effective appl…	31
	Freedom from product leakage	Freedom from product leakage is the most important factor. It is important to note that: ⎯ incontinence episodes (urine leaking from the body) differ between persons in terms of such parameters as volumes, frequencies and flow rates; ⎯ for the same person these same parameters can vary over time or, for example, with time of day or circumstances. Properties and features known to have an impact on…	31
	Emotional well-being	Quality of Life Domains and indicators Emotional well-being: contentment (satisfaction, moods, enjoyment), self-concept (identity, self-worth, self-esteem), lack of stress (predictability and control) Availability of support groups	32, 38, 44, 48, 58, 75, 76, 84
	Physical well-being	Quality of Life Domains and indicators physical well-being: health (functioning, symptoms, fitness, nutrition), activities of daily living (self-care skills, mobility), leisure (recreation, hobbies)	32, 38, 48
	Self-determination	Quality of Life Domains and indicators self-determination: autonomy. Personal control (independence), goals and personal values (desires, expectations), choices (opportunities, options and preferences)	32, 38
	Social inclusion	Quality of Life Domains and indicators social inclusion: community integration and participation, social supports (support network, services)	32, 38, 44, 58
	Percentage of residents who are incontinent with urine at least once a week	Definition: Percentage of residents who are incontinent with urine at least once a week Operationalisation: Urine incontinence means: every type of unintentional urine loss. Urine retention is not incontinence. This indicator is measured for a defined day once a year as a prevalence measure. Alternatively, it can be based on continuous care documentation. Measurement / Calculation formula: Numera…	32
	Percentage of residents with a long‐term catheter, inserted more than 14 days ago	Definition: Percentage of residents with a long‐term catheter, inserted more than 14 days ago Operationalisation: Do not measure with residents who already had a long‐term catheter at the time they moved to the care home. The choice for a 14‐day period is to make a difference between acute and chronic catheter use. Acute catheter use is for example indicated for residents who receive palliative c…	32
	Percentage of relatives/friends who feel emotionally supported	Definition: Percentage of relatives/friends who feel emotionally supported Operationalisation: This indicator is generated as an item constructed for its purpose on annual satisfaction surveys or qualitative interviews with relatives/friends. Measurement / Calculation formula: Numerator: Number of relatives/friends feeling emotionally supported Denominator: Total number of relatives/friends surve…	32
	Percentage of relatives/friends who feel involved in decision‐making about their resident’s care	Definition: Percentage of relatives/friends who feel involved in decision‐making about their resident’s care Operationalisation: This indicator is generated as an item, constructed for its purpose, on annual satisfaction surveys or qualitative interviews with relatives/friends Measurement / Calculation formula: Numerator: Number of relatives/friends feeling involved Denominator: Total number of r…	32
	Percentage of residents who feel staff encourage them to help themselves	Definition: Percentage of residents who feel staff encourage them to help themselves Operationalisation: This indicator is generated as an item, constructed for its purpose, on annual satisfaction surveys, CARE profiles (item #25), or qualitative interviews with residents and/or their representatives. Measurement / Calculation formula: Numerator: Number of residents feeling staff encourage them D…	32
	Percentage of residents who feel staff give them time to do things on their own	Definition: Percentage of residents who feel staff give them time to do things on their own Operationalisation: This indicator is generated as an item, constructed for its purpose, on annual satisfaction surveys, CARE profiles (item #18), or qualitative interviews with residents and/or their representatives. Measurement / Calculation formula: Numerator: Number of residents feeling staff give them…	32
	Percentage of residents who feel they have sufficient control over their daily living	Definition: Percentage of residents who feel they have sufficient control over their daily living Operationalisation: This indicator is generated as an item, constructed for its purpose, on annual satisfaction surveys or qualitative interviews with residents and/or their representatives. Measurement / Calculation formula: Numerator: Number of residents feeling they have control Denominator: Total…	32
	Patient access to information on incontinance and the use of containment products	Participants identified the following key quality principles to improve the quality of care and well-being of people with incontinence at home and in the community: 3. Information, education and communication o Having access to comprehensive information on incontinence, the availability and use of containment products so that patients and carers are well informed o Emphasizing the important role …	33, 59
	Social participation and functional ability	Social participation and functional ability at the level desired indicated by the individual patient is viewed as a key indicator area in achieving better quality and outcomes from the provisions for the day-to-day management of incontinence. They highlighted enhanced quality of life and wellbeing based on individual life goals as the desired end points - measured by the number of people with inc…	33
	Reduction in the number of complications	Complications include urinary tract infections, falls sores	33
	Avoidance of falls		33
	Reduction of unplanned hospital (re)admissions		33, 58, 62
	Improved skin health		33, 71
	Number of continence nurse specialists in primary care working closely with family physicians and community workers		33
	continence care training and curriculum development		33
	Number of health and social care professionals trained		33
	Number of continence care assessments evaluating the patient's needs and how containmen tprovisions and products meets these needs		33
	Ability to work		33, 44, 48
	Reduction in the number of GP vists		33
	Delay in institutionalization, i.e. a change in the number of people that are being admitted to nursing / care homes due to their incontinence		33
	Reduction in acute hospitalisations and associated costs		37, 39
	Product consumption per day and night		42
	Self-efficacy / self-care behavious	Aims to measure increased self-treatment , promotion fo self-management and patient education	50, 57
	Main patient complaint	Aims to give a general impression of patients view of what needs to be resolved	51
	Toilet pattern acuity	patient may be continent but only die to excessively frequent toileting (reduced bladder)	51
	Ease of access to toileting	To record and remove barriers to toileting: seating, distance, stairs, doors, staff/carer responsibility and implement interventions for patients with mobility / dexterity issues Proximity and availability bathromms or commode and adequacy of lighting	51, 59, 82
	Case detection of urinary and / or fecal incontinence		57, 73
	Ease of access of robust referral pathways from detection of incontinence through to appropriate assesment and treatment		57
	Patient responsibility shift from primary care physicians to continence nurse specialist		57
	Training of HCPs (care-based nurse practitioners, community nurses, physician assistants) to provide toiletin and containment management		57
	Use of multi-disciplinary teams		57
	Use of voiding record	To monitor the provision of bladder training/prompted voiding's with gradual increasing time between voiding	58
	Skin cleansing after an incontinence episode and utlitising barrier ointments		58
	Product selection consistent with patient preferences		58
	Provision of advice on skin care (cleaning, skin barriers)		58
	Access to local continence specialists		58
	Number of individuals experiencing deterioration in skin problems		60, 89
	Number of soiled pieces per day		60
	Weight of soiled pieces		60
	Total average cost per clean up episode		60
	Time per clean up episode		60
	Number of individuals experiencing difficulty with insertion		60
	Number of individuals experiencing difficulty with removal		60
	Length of time before admission to residential/nursing/home/hospital care		60
	Number of linen changes		60
	Days of sitting out of bed		62
	Length of hospital stay		62
	Patient satisfaction with leg bag performance	patient satisfaction with leg bag performance: - ease of attaching the leg bag to the catheter tubing - ease of leg bag removal - ease of attaching leg bag to leg - ease of opening/closing leg bag to tap - urine spillage on fingers when emptying leg bag - comfort of the leg bag when worn - comfort of skin underneath the leg bag (leg sweating) - comfort of straps when worn - discreetness of leg ba…	63
	Severity of fecal incontinence		64, 73
	Average length of containment product wear time		65
	Average length of use of rectal tube/trumpet and frequency of change to prevent skin problems		65
	Ease of changing containment product		66
	Impact on carer	Reudction in cost to carer (over valuation of carer time/individual budgets: same costs & better quality of life) Measure on carer outcomes - carer QoL - stress/burden (e.g. Zarit) - protective factors (e.g. COPE) Caring related QoL (e.g. CarerQol-7D) - General/health-related QoL (e.g. EQ-5D) ASCOT equivalent for carers - control, occupation, social participation - self care, safety - support, ti…	74
	Identification of high risk groups		77
	Assesment of manual dexterity		83
	Quantity and frequency of leakage day and night	including the type of leakage	83
	Access to laundry facilities		83

## Sheet: 2. Prioritisation Criteria 
Reference guide of the Prioritisation Criteria and ranking mechanism to be applied by the expert panel in worksheet "1. KPI Longlist"
Key
Prioritisation Criteria	= The prioritisation criteria will be applied by the expert panel to remove, reframe, or rephrase the KPIs gathered through secondary research
In scope	= Expert panel to input 'Y' or 'N' to indicate whether the KPI is within the scope of our research
Relevant	= Expert panel to input 'H', 'M', 'L', to indicate whether the indicator is relevant to a) patients b) care providers c) payers
Measurable	= Expert panel to input 'H', 'M', 'L', to indicate whether the KPI is linked to a process that can be measured
Robust	= Expert panel to input 'H', 'M', 'L', to indicate whether the KPI is supported by validated endpoints
	Prioritisation Criteria	Ranking
	In Scope
		HIGH	MEDIUM	LOW
	Relevant	High relevance to all stakeholders or very high relevance to one stakeholder	Some relevance to most/all stakeholders	Little relevance to any stakeholders
	Measurable	Ease of measurement in all care settings	Ease of measurement in one care setting	Hard to measure
	Robust	Validated endpoints	Partial validation of endpoints	Lack of validation of endpoints
